# Supplementary material for: Metagenomics-informed soil biogeochemical models projected less carbon loss in tropical soils in response to climate warming
Source: Research Square preprint supplement (doi:10.21203/rs.3.rs-918612/v1), 2021-09-20
Supplement: Supplementary file 1 [file 9f91665f23ac06a90f2ddb8b.xlsx]

## Sheet: Sheet1
	Supplementary Data S2. EC numbers in soil enzyme function classes (EFCs) for organic matter decomposition and mineralization in the Gigante soil and differential analysis of gene abundances for each enzyme between P-deficient Control and P-fertilized soils
Biogeochemical Procsses	EFC classification			Classification rlue 1	Classification rlue 2	E.C. number	Gene Abundances				Comparison of P-deficient Control relative to P-fertilized			Description	Enzyme function
	EFC ID			The chemical component of substrate	The bonds of substrate that the EFC cleaves for organic matter /the function of the EFC for inorganic N or P		P-fertilized soils		P-deficient soils (Control)
	CoMENDH & CoMENDHD	CoMENDM	CoMENDL				Plot 1	Plot 30	Plot 6	Plot 36	log2 fold change	p-value	q-value
Lignocellulose-containing SOM decomposition	Cendo1			Carbohydrate (Celluose)	The internal C-O bonds of polymer chains	3.2.1.4	433683	397853	507907	454004	0.154291	0.0328713	0.152488	Cellulase	Cellulose degradation (pathway ID: P1)
				Carbohydrate (Hemicelluose)	The internal C-O bonds of polymer chains	3.2.1.8	143807	116447	159519	159154	0.240535	0.090115	0.264323	Endo-1,4-beta-xylanase	Hemicellulose xylan degradation (pathway ID: P3)
				Carbohydrate (Hemicelluose)	The internal C-O bonds of polymer chains	3.1.1.73	137474	111815	151461	131557	0.127463	0.375724	0.536585	Feruloyl esterase	Hemicellulose xyloglucan degradation (pathway ID: P4)
				Carbohydrate (Hemicelluose)	The internal C-O bonds of polymer chains	3.2.1.136	49190.5	39596	60329.5	39257.5	0.10197	0.668546	0.666998	Glucuronoarabinoxylan endo-1,4-beta-xylanase	Hemicellulose degradation (pathway ID: P5)
				Carbohydrate (Hemicelluose)	The internal C-O bonds of polymer chains	3.2.1.99	38985.8	30564.4	49293	49637.8	0.457289	0.0250542	0.132518	Arabinan endo-1,5-alpha-L-arabinanase	Hemicellulose L-arabinan degradation (pathway ID: P2)
				Carbohydrate (Hemicelluose)	The internal C-O bonds of polymer chains	3.2.1.89	1907.47	2092.76	3822.9	4373.69	0.984674	0.00117981	0.0232922	Arabinogalactan endo-beta-1,4-galactanase	Hemicellulose type 1 arabinogalactans degradation (pathway ID: P6)
				Carbohydrate (Starch)	The internal C-O bonds of polymer chains	3.2.1.1	259410	267675	299443	279398	0.0795013	0.370124	0.534195	Alpha-amylase	Starch degrdation (pathway ID: P7)
				Carbohydrate (Starch)	The internal C-O bonds of polymer chains	3.2.1.135	77160.6	88133.9	106819	77533.2	0.0937965	0.612776	0.641958	Neopullulanase	Starch pullulan degrdation (pathway ID: P9)
				Carbohydrate (Starch)	The internal C-O bonds of polymer chains	2.4.1.19	39220.4	42410.6	49536.6	35899	0.00253648	0.990329	0.76079	Cyclomaltodextrin glucanotransferase	Starch degrdation (pathway ID: P8)
				Carbohydrate (Starch)	The internal C-O bonds of polymer chains	3.2.1.41	15879.3	20117.3	27597.5	31634.1	0.666994	0.00656648	0.0637405	Pullulanase	Starch degrdation (pathway ID: P7)
				Carbohydrate (Starch)	The internal C-O bonds of polymer chains	3.2.1.68	7247.97	8870.17	10725	9459.29	0.265836	0.296321	0.483759	Isoamylase	Starch 1,6-D-glucan degrdation (pathway ID: P10)
				Carbohydrate (Starch)	The internal C-O bonds of polymer chains	3.2.1.39	4849.11	4450.98	5918.76	3654.62	-0.0242555	0.936824	0.752894	Glucan endo-1,3-beta-D-glucosidase	Starch 1,3-D-glucan degrdation (pathway ID: P10)
				Carbohydrate (Pectin)	The internal C-O bonds of polymer chains	3.2.1.15	121728	102780	128798	96120.9	-0.057588	0.730301	0.695424	Endo-polygalacturonase	Pectin homogalacturonan degradation (pathway ID: P13)
				Carbohydrate (Pectin)	The internal C-O bonds of polymer chains	3.1.1.11	24835.6	21016.1	32678.5	34442.5	0.499315	0.0183411	0.115854	Pectinesterase	Pectin homogalacturonan degradation (pathway ID: P13)
				Carbohydrate (Pectin)	The internal C-O bonds of polymer chains	4.2.2.23	19329.7	20469.3	35071	67495.1	1.32979	0.000160694	0.00620078	Rhamnogalacturonan endolyase	Pectin rhamnogalacturonan degradation (pathway ID: P14)
				Carbohydrate (Pectin)	The internal C-O bonds of polymer chains	4.2.2.10	655.308	343.571	775.588	1140.62	0.90277	0.0581392	0.211767	Pectin lyase	Pectin degradation (pathway ID: P12)
	Cexo			Carbohydrate (Celluose)	The terminal C-O bonds of polymer chains	3.2.1.91	93900.2	74056.8	98928.8	109517	0.263147	0.143417	0.331515	Cellulose 1,4-beta-cellobiosidase (non-reducing end)	Cellulose degradation (pathway ID: P1)
				Carbohydrate (Hemicelluose)	The terminal C-O bonds of polymer chains	3.2.1.37	308272	258189	357240	331273	0.227508	0.0250016	0.132518	Xylan 1,4-beta-xylosidase	Hemicellulose xylan degradation (pathway ID: P3 and P5)
				Carbohydrate (Hemicelluose)	The terminal C-O bonds of polymer chains	3.2.1.55	156605	143875	196074	189497	0.306102	0.000220956	0.00708701	Non-reducing end alpha-L-arabinofuranosidase	Hemicellulose L-arabinan degradation (pathway ID: P2)
				Carbohydrate (Hemicelluose)	The terminal C-O bonds of polymer chains	3.2.1.23	148891	134274	180048	135866	0.0974028	0.418445	0.556349	Beta-galactosidase	Hemicellulose xyloglucan degradation (pathway ID: P4)
				Carbohydrate (Starch)	The terminal C-O bonds of polymer chains	3.2.1.54	15901.9	21112.5	25497.9	17475.7	0.148851	0.582578	0.636748	Cyclomaltodextrinase	Starch degrdation (pathway ID: P8)
				Carbohydrate (Starch)	The terminal C-O bonds of polymer chains	3.2.1.2	1204.51	1413.97	1909.56	1507.97	0.322686	0.336503	0.509844	Beta-amylase	Starch degrdation (pathway ID: P7)
				Carbohydrate (Pectin)	The terminal C-O bonds of polymer chains	4.2.2.2	42025.1	33253.2	55194	87862.7	0.887903	0.00215973	0.0325792	Pectate lyase	Pectin degradation (pathway ID: P12)
				Carbohydrate (Pectin)	The terminal C-O bonds of polymer chains	3.2.1.82	33726	32126.1	40539.7	39850.6	0.234356	0.213348	0.412566	Exo-poly-alpha-galacturonosidase	Pectin homogalacturonan degradation (pathway ID: P13)
				Carbohydrate (Pectin)	The terminal C-O bonds of polymer chains	4.2.2.22	32391.8	20743.9	31973.1	49486.3	0.579025	0.0760349	0.241456	Pectate trisaccharide-lyase	Pectin degradation (pathway ID: P12)
	Coligo	Ccarbohydrates	Clignocellulose	Carbohydrate (Celluose)	The C-O bonds in oligopolymers	3.2.1.21	1.0953e+06	959737	1.11865e+06	1.09929e+06	0.0573203	0.422246	0.558963	Beta-glucosidase	Cellulose degradation (pathway ID: P1)
				Carbohydrate (Hemicelluose)	The C-O bonds in oligopolymers	3.2.1.185	207967	183079	225645	211362	0.106176	0.322942	0.50028	Non-reducing end beta-L-arabinofuranosidase	Hemicellulose L-arabinan degradation (pathway ID: P2)
				Carbohydrate (Hemicelluose)	The C-O bonds in oligopolymers	3.2.1.177	163460	156214	197391	178873	0.179346	0.0957283	0.268648	Alpha-D-xyloside xylohydrolase	Hemicellulose xyloglucan degradation (pathway ID: P4)
				Carbohydrate (Hemicelluose)	The C-O bonds in oligopolymers	3.2.1.55	156605	143875	196074	189497	0.306102	0.000220956	0.00708701	Non-reducing end alpha-L-arabinofuranosidase	Hemicellulose-L-arabinan degradation (pathway ID: P2)
				Carbohydrate (Hemicelluose)	The C-O bonds in oligopolymers	3.2.1.23	148891	134274	180048	135866	0.0974028	0.418445	0.556349	Beta-galactosidase	Hemicellulose arabinogalactans degradation (pathway ID: p6)
				Carbohydrate (Starch)	The C-O bonds in oligopolymers	3.2.1.20	343340	336601	385000	323968	0.00218312	0.979571	0.75989	Alpha-glucosidase	Starch degradation (pathway ID: P7-P11)
				Carbohydrate (Starch)	The C-O bonds in oligopolymers	3.2.1.3	167611	161094	154173	104939	-0.407135	0.0158854	0.105005	Glucan 1,4-alpha-glucosidase	Starch degradation (pathway ID: P7-P11)
				Carbohydrate (Starch)	The C-O bonds in oligopolymers	3.2.1.26	16986.1	16238.3	24580.8	13481	0.126411	0.671028	0.666998	Beta-fructofuranosidase	Starch degradation (pathway ID: P7-P11)
				Carbohydrate (Starch)	The C-O bonds in oligopolymers	3.2.1.10	14944.7	12458.9	22821.8	16583.7	0.463166	0.059546	0.212842	Oligo-1,6-glucosidase	Starch degradation (pathway ID: P7-P11)
				Carbohydrate (Pectin)	The C-O bonds in oligopolymers	3.2.1.172	48191.4	48256.8	69755.8	67808.4	0.458077	0.00671328	0.0638234	Unsaturated rhamnogalacturonyl hydrolase	Pectin rhamnogalacturonan degradation (pathway ID: P14)
				Carbohydrate (Pectin)	The C-O bonds in oligopolymers	3.2.1.67	3982.9	2291.92	2569.67	2277.87	-0.424356	0.238027	0.432692	Exo-galacturan 1,4-alpha-galacturonidase	Pectin degradation (pathway ID: P12-P13)
	Cendo2	Clignin		Lignin	The internal C-C or C-O bonds of heteropolymers	1.11.1.-	1.40152e+06	1.35814e+06	1.40104e+06	1.20951e+06	-0.137437	0.0160595	0.10551	Peroxidases	Lignin degradation (pathway ID: P15)
				Lignin	The internal C-C or C-O bonds of heteropolymers	1.10.3.-	1.78036e+06	1.75783e+06	1.69846e+06	1.35552e+06	-0.220495	0.0128842	0.0919858	Peroxidases	Lignin degradation (pathway ID: P15)
N-containing SOM decomposition and mineralization	Nendo			Proteins	The internal C-N bonds of polymer chains	3.4.21.50	6283.96	9783.98	15731.4	19597.8	1.08573	0.0006497	0.0157585	Lysyl endopeptidase	Proteins serine degradation
				Proteins	The internal C-N bonds of polymer chains	3.4.21.4	59217.4	65330.1	91249.2	91651	0.500256	0.00225456	0.0325792	Trypsin	Proteins serine degradation
				Proteins	The internal C-N bonds of polymer chains	3.4.21.62	307983	353896	306183	390000	0.225908	0.0315234	0.148672	Subtilisin	Proteins serine degradation
				Proteins	The internal C-N bonds of polymer chains	3.4.21.81	4412.34	7770.47	4795.82	5726.89	0.488931	0.0718011	0.232648	Streptogrisin B	Proteins serine degradation
				Proteins	The internal C-N bonds of polymer chains	3.4.21.19	18313	27273.4	28800.7	35316.9	0.441133	0.11958	0.302928	Glutamyl endopeptidase	Proteins serine degradation
				Proteins	The internal C-N bonds of polymer chains	3.4.21.66	68134	85053.7	85875.5	85652.7	0.0933187	0.612385	0.641958	Thermitase	Proteins serine degradation
				Proteins	The internal C-N bonds of polymer chains	3.4.22.8	1671.88	4331.25	3046.56	6212.85	1.11155	0.00682227	0.0639955	Clostripain	Proteins cysteine degradation
				Proteins	The internal C-N bonds of polymer chains	3.4.24.28	22974.6	28556.8	44496	60457.1	0.97959	0.000174063	0.00642462	Bacillolysin	Protein/peptides degradation
				Proteins	The internal C-N bonds of polymer chains	3.4.24.40	43677.9	60372.9	87419	102778	0.818639	0.00038709	0.0111393	Serralysin	Protein/peptides degradation
				Proteins	The internal C-N bonds of polymer chains	3.4.24.55	1036.38	1002.33	3163.57	1722.02	1.19145	0.002007	0.032147	Pitrilysin	Protein/peptides degradation
				Proteins	The internal C-N bonds of polymer chains	3.4.24.27	4580.84	7260.85	10732	12911.1	0.945433	0.00371981	0.0467828	Thermolysin	Protein/peptides degradation
				Proteins	The internal C-N bonds of polymer chains	3.4.24.77	1114.92	2024.21	1282.28	2682.35	0.926518	0.00906346	0.0761802	Snapalysin	Protein/peptides degradation
				Proteins	The internal C-N bonds of polymer chains	3.4.24.76	2635.36	5113.53	3453.48	5129.49	0.694956	0.018766	0.115854	Flavastacin	Protein/peptides degradation
				Proteins	The internal C-N bonds of polymer chains	3.4.24.33	20917.3	23038	28887.9	31876.4	0.415768	0.0556952	0.207233	Peptidyl-Asp metalloendopeptidase	Protein/peptides degradation
				Proteins	The internal C-N bonds of polymer chains	3.4.24.29	1126.92	2853.12	2955.09	3473.95	0.576683	0.245827	0.440905	Aureolysin	Protein/peptides degradation
				Proteins	The internal C-N bonds of polymer chains	3.4.24.3	1048.24	1346.38	1374.34	1581.46	0.222022	0.538743	0.620592	Microbial collagenase	Protein/peptides degradation
				Proteins	The internal C-N bonds of polymer chains	3.4.99.-	3516.93	2637.94	1495.49	1265.56	-1.21211	0.000201244	0.00669966	Endopeptidases of unknown catalytic mechanism	Protein/peptides degradation
	Nexo1			Proteins	The terminal C-N bonds of polymer chains	3.4.16.-	229800	224759	282178	245081	0.156837	0.0949674	0.26802	Serine-type carboxypeptidases	Protein C-terminal degradation
				Proteins	The terminal C-N bonds of polymer chains	3.4.17.-	412946	450992	509744	510365	0.185613	0.0303994	0.146502	Metallocarboxypeptidases	Protein C-terminal degradation
				Proteins	The terminal C-N bonds of polymer chains	3.4.17.14	7953.74	7123.84	9595.42	12010.5	0.47283	0.0784175	0.243848	Zinc D-Ala-D-Ala carboxypeptidase	Protein C-terminal degradation
				Proteins	The terminal C-N bonds of polymer chains	3.4.17.18	13777.6	17711.2	18242.2	26642	0.466436	0.119897	0.302928	Carboxypeptidase T	Protein C-terminal degradation
				Proteins	The terminal C-N bonds of polymer chains	3.4.19.3	154339	149801	139046	123833	-0.266763	0.0243928	0.132279	Pyroglutamyl-peptidase I	Protein C-terminal degradation
				Proteins	The terminal C-N bonds of polymer chains	3.4.19.11	1876.13	1750.82	2113.17	2595.33	0.329297	0.313848	0.493271	Gamma-D-glutamyl-meso-diaminopimelate peptidase	Protein C-terminal degradation
				Proteins	The terminal C-N bonds of polymer chains	3.4.14.-	59733.8	52789.5	53444.3	44044.9	-0.264726	0.14637	0.333647	Dipeptidyl-peptidases and tripeptidyl-peptidases	Protein N-terminal degradation
				Proteins	The terminal C-N bonds of polymer chains	3.4.14.11	21335.6	22431.4	31363.1	44766.8	0.75481	0.00420213	0.0502436	Xaa-Pro dipeptidyl-peptidase	Protein N-terminal degradation
				Proteins	The terminal C-N bonds of polymer chains	3.4.14.12	413853	437943	495262	544602	0.236648	0.0190047	0.116488	Xaa-Xaa-Pro tripeptidyl-peptidase	Protein N-terminal degradation
				Proteins	The terminal C-N bonds of polymer chains	3.4.11.9	226464	278470	311771	350990	0.340599	0.0213416	0.123706	Xaa-Pro aminopeptidase	Protein N-terminal degradation
				Proteins	The terminal C-N bonds of polymer chains	3.4.11.23	13566.7	12903.4	16807.2	14192.9	0.170149	0.448731	0.574136	PepB aminopeptidase	Protein N-terminal degradation
				Proteins	The terminal C-N bonds of polymer chains	3.4.11.24	63926.1	72767.6	83112.4	97011.6	0.347932	0.0641096	0.218571	Aminopeptidase S	Protein N-terminal degradation
				Proteins	The terminal C-N bonds of polymer chains	3.4.11.10	21867.3	23977.2	29135.8	33050.8	0.389282	0.0763237	0.241456	Bacterial leucyl aminopeptidase	Protein N-terminal degradation
				Proteins	The terminal C-N bonds of polymer chains	3.4.11.1	706744	740115	701406	710186	-0.0119421	0.83202	0.720435	Leucyl aminopeptidase (Glutathione metabolism)	Protein N-terminal degradation
				Proteins	The terminal C-N bonds of polymer chains	3.4.11.5	703857	732256	679192	675097	-0.0302585	0.576269	0.636057	Prolyl aminopeptidase	Protein N-terminal degradation
				Proteins	The terminal C-N bonds of polymer chains	3.4.11.-	932268	1.01401e+06	848311	976844	0.107415	0.0805783	0.247844	Aminopeptidases	Protein N-terminal degradation
	Noligo1	NProtein	N-containing	Proteins	The C-N bonds in oligopolymers	3.4.15.5	247213	221155	211365	178699	-0.321131	0.00329934	0.0427617	Peptidyl-dipeptidase Dcp	Protein C-terminal degradation
				Proteins	The C-N bonds in oligopolymers	3.4.13.18	11813.9	7184.97	12793.2	13976.3	0.447995	0.140708	0.329294	Cytosol nonspecific dipeptidase	Protein N-terminal degradation
				Proteins	The C-N bonds in oligopolymers	3.4.13.22	257287	265557	238712	200667	-0.309517	0.00228972	0.0325792	D-Ala-D-Ala dipeptidase	Protein N-terminal degradation
				Proteins	The C-N bonds in oligopolymers	3.4.13.21	88892.2	100953	99223.5	100874	0.0471473	0.755503	0.70441	Dipeptidase E	Protein N-terminal degradation
				Proteins	The C-N bonds in oligopolymers	3.4.13.-	57222.1	51425.4	51871.5	46001.9	-0.206546	0.00124364	0.0237248	Dipeptidases	Protein N-terminal degradation
	Nexo2	Ncellwall-N		Chitin	The terminal C-O bonds of polymer chains	3.2.1.14	169012	156365	191952	185360	0.159942	0.146605	0.333647	Chitinase	Chitin hydrolysis
				Chitin	The terminal C-O bonds of polymer chains	3.2.1.132	12228.5	21592.7	14808.3	18512.7	0.509515	0.0303649	0.146502	Chitosanase	Chitosan hydrolysis
	Noligo2			Chitin	The C-O bonds in oligopolymers	3.2.1.52	565645	594810	535133	505509	-0.0581386	0.408494	0.55176	Beta-N-acetylhexosaminidase	Chitin hydrolysis
				Chitin	The C-O bonds in oligopolymers	3.2.1.165	119031	120706	135490	64182	-0.337847	0.254121	0.447026	Exo-1,4-beta-D-glucosaminidase	Chitosan hydrolysis
	Nmono	Nmono		MonomerN	The C-N bond	4.3.1.7	333770	333539	316488	256550	-0.279078	0.00408032	0.0494841	Ethanolamine ammonia-lyase	Microbial intracellular N mineralization
				MonomerN	The C-N bond	4.3.1.1	144617	151261	169363	220384	0.351215	0.0474214	0.188153	Aspartate ammonia-lyase	Microbial intracellular N mineralization
				MonomerN	The C-N bond	4.3.1.27	41486.2	41691.2	51095.9	58459.1	0.3478	0.0752516	0.241068	Threo-3-hydroxy-D-aspartate ammonia-lyase	Microbial intracellular N mineralization
				MonomerN	The C-N bond	4.3.1.-	61654.8	75304.9	65554.2	57451.2	-0.213909	0.250156	0.44454	Ammonia-lyases	Microbial intracellular N mineralization
				MonomerN	The C-N bond	4.3.1.18	329.322	381.488	474.486	503.163	0.407405	0.30104	0.486735	D-serine ammonia-lyase	Microbial intracellular N mineralization
	NinN1	NinN1		Inorganic N	Nitrification	1.7.7.1	438510	400607	439016	344862	-0.292956	0.000105025	0.00478448	Ferredoxin---nitrite reductase	Nitrification
				Inorganic N	Nitrification	1.7.2.6	49449.9	48938.7	40653.6	28672.4	-0.281987	0.288412	0.479292	Hydroxylamine dehydrogenase	Nitrification
	NinN2	NinN2		Inorganic N	Denitrification	1.7.2.1	270534	289680	298043	352578	0.127154	0.383827	0.540692	Nitrite reductase	Denitrification
				Inorganic N	Denitrification	1.7.2.5	201293	232860	184532	188233	0.0675073	0.562744	0.629832	Nitric oxide reductase	Denitrification
				Inorganic N	Denitrification	1.7.2.4	71693.2	69321.5	55545.3	87483.4	0.256848	0.243736	0.439158	Nitrous-oxide reductase	Denitrification
	NinN3	NinN3		Inorganic N	N assimilation	6.3.1.2	1809076	1809632	1727280	1704585	-0.06	0.208	0.405	Glutamate---ammonia ligase	Ammonium assimilation
				Inorganic N	N assimilation	1.4.1.2	322337	305667	297786	276324	-0.14713	0.0865065	0.259951	Glutamate dehydrogenase	Ammonium assimilation
				Inorganic N	N assimilation	1.7.99.4	866071	744667	694176	745685	-0.117549	0.244214	0.439158	Nitrate reductase	Assimilatory nitrite reduction
				Inorganic N	N assimilation	1.7.2.2	58958.8	82951.2	86528.5	129154	0.499588	0.0960266	0.269041	Nitrite reductase (cytochrome; ammonia-forming)	Assimilatory nitrite reduction
				Inorganic N	N assimilation	1.7.1.4	201099	235446	196317	218779	0.13749	0.159433	0.346218	Nitrite reductase [NAD(P)H]	Assimilatory nitrite reduction
				Inorganic N	N assimilation	1.7.1.15	47897.2	47990.7	43461.1	67764.9	0.298657	0.220108	0.420579	Nitrite reductase (NADH)	Assimilatory nitrite reduction
	NinN4	NinN4		Inorganic N	N fixation	1.18.6.1	2948	5571	1975	2578	0.66	0.01	0.3	Nitrogenase	N fixation
P-containing SOM decomposition and mineralization	Pexo1			Nucleic acids	The terminal phosphoester bonds of polymer chains	3.1.27.-	156340	129991	127303	85576.3	-0.490658	0.00992979	0.0813923	Endoribonucleases producing other than 5'-phosphomonoesters	Ribonucleic acid degradation
				Nucleic acids	The terminal phosphoester bonds of polymer chains	3.1.27.3	26456.6	36474.7	31057.7	38677	0.332772	0.11519	0.298813	Ribonuclease T1	Ribonucleic acid degradation
				Nucleic acids	The terminal phosphoester bonds of polymer chains	3.1.21.2	311745	341697	296880	313379	0.0506833	0.53157	0.618603	Deoxyribonuclease IV	Deoxyribonucleic acid degradation
				Nucleic acids	The terminal phosphoester bonds of polymer chains	3.1.21.1	3418.79	5272.25	5906.11	4227.44	-0.0375931	0.914302	0.749098	Deoxyribonuclease I	Deoxyribonucleic acid degradation
	Poligo1	Pnucleicacids	PdiesterP	Nucleic acids	The phosphoester bonds in oligopolymers	3.1.4.16	28302.6	35883.9	34142.1	38219.7	0.120731	0.598183	0.639452	2',3'-cyclic-nucleotide 2'-phosphodiesterase	Ribonucleic acid degradation
				Nucleic acids	The phosphoester bonds in oligopolymers	3.1.13.-	18251.1	19020.1	30585.3	29264	0.628271	0.00220814	0.0325792	Exoribonucleases producing 5'-phosphomonoesters	Ribonucleic acid degradation
	Pexo2			Phospholipids	The C-O bond	3.1.1.32	5766.23	5378.58	8971.23	16265.5	1.14273	0.00157387	0.0272673	Phospholipase A1	Phospholipids degradation
				Phospholipids	The C-O bond	3.1.1.4	5658.35	5280.65	8651.96	16003.1	1.13649	0.00199618	0.032147	Phospholipase A2	Phospholipids degradation
				Phospholipids	The C-O bond	3.1.1.5	167314	155611	152274	123159	-0.288291	0.0241478	0.132256	Lysophospholipase	Phospholipids degradation
	Poligo2	Pphospholipdis	PdiesterP	Phospholipids	The phosphoester bond before P	3.1.4.3	1.21323e+06	1.06994e+06	1.11909e+06	630759	-0.452121	0.0299838	0.146502	Phospholipase C	Phospholipids degradation
				Phospholipids	The phosphoester bond before P	3.1.4.4	478641	533521	548388	524344	0.0282481	0.734011	0.696634	Phospholipase D	Phospholipids degradation
				Phospholipids	The phosphoester bond before P	3.1.4.46	451444	488914	535859	586264	0.203437	0.0446136	0.185201	Glycerophosphodiester phosphodiesterase	Phospholipids degradation
	Pmono1	Pmono1	PmonomerP	Monomer P (Inositol P)	The phosphoester bond	3.1.3.26	16347.8	23049.7	22522.7	16084	-0.0565888	0.83714	0.721348	4-phytase	Phytate mineralization
				Monomer P (Inositol P)	The phosphoester bond	3.1.3.8	8131.99	12103.7	27901.6	65075.1	2.16579	2.71507e-06	0.000384149	3-phytase	Phytate mineralization
	Pmono2	Pmono2		MonomerP (non-Inositol P)	The phosphoester bond	3.1.3.2	50170	53506.2	64107.7	41896.1	-0.0339038	0.879224	0.736983	Acid phosphatase	General monophosphate mineralization
				MonomerP (non-Inositol P)	The phosphoester bond	3.1.3.39	12267.8	13222.5	18708.3	19231.3	0.520442	0.0214021	0.123706	Streptomycin-6-phosphatase	General monophosphate mineralization
	Pmono3	Pmono3	Pmono3	MonomerP (non-Inositol P)	The phosphoester bond	3.1.3.1	465085	580276	637622	770705	0.380071	0.0154696	0.103815	Alkaline phosphatase	Micorbial intracelluar P mineralization
				MonomerP (non-Inositol P)	The phosphoester bond	3.1.3.10	1268.98	1482.71	1499.52	989.205	-0.21125	0.56002	0.629196	Glucose-1-phosphatase	Micorbial intracelluar P mineralization
	PinP	PinP	PinP	Inorganic P	P immobilization	3.6.3.27	916947	974053	908766	921124	-0.00102506	0.984561	0.760098	Phosphate-transporting ATPase (ABC-Type) (PstB)	P immobilization
				Inorganic P	P immobilization	3.6.3.28	390381	368558	419462	348359	-0.231449	0.0049422	0.0550905	Phosphonate-transporting ATPase (ABC-Type)	P immobilization
				Inorganic P	P immobilization	3.6.3.20	551310	531910	562677	543136	-0.0242981	0.701246	0.682298	Glycerol-3-phosphate-transporting ATPase	P immobilization
