# Supplementary material for: Metagenomics-informed soil biogeochemical models projected less carbon loss in tropical soils in response to climate warming
Source: Research Square preprint supplement (doi:10.21203/rs.3.rs-918612/v1), 2021-09-20
Supplement: Supplementary file 2 [file de76b45f4f0b437b78140b0a.xlsx]

## Sheet: Sheet1
Supplementary Data S3. Microbial-activated (A), mineral-protected (M), and adsorbed (Q) soil organic matter (SOM) pools, inorganic N and P pools, and the corresponding soil enzyme functional groups (EFCs) that act on each pool in the CoMEND model
SOM and inorganic N and P pools	Pool description	The EFC acted on the soil pool
AROM1	Microbial-activated carbohydrate residue pool	Cendo1
AROM2	Microbial-activated lignin residue pool	Cendo2
AROM3	Microbial-activated protein residue pool	Nendo1
AROM4	Microbial-activated chitin residue pool	Nendo2
AROM5	Microbial-activated nucleic acids residue pool	Pexo1
AROM6	Microbial-activated phospholipid residue pool	Pexo2
AROM7	Microbial-activated inositol phosphorus residue pool	Pmono1
ALOM1	Microbial-activated large carbohydrate polymer pool	Cexo
ALOM2	Microbial-activated polypeptide pool	Nexo1
AOOM1	Microbial-activated carbohydrate oligopolymer pool	Coligo
AOOM2	Microbial-activated oligopeptide pool	Noligo1
AOOM3	Microbial-activated chitin oligopolymer pool	Noligo2
AOOM4	Microbial-activated oligonucleotide pool	Poligo1
AOOM5	Microbial-activated lyso-phosphatidylcholine polymer pool	Poligo2
DOM	Dissolved organic monomer pool	Pmono2
QROM1	Adsorbed phase of carbohydrate residue pool	-
QROM2	Adsorbed phase of lignin residue pool	-
QROM3	Adsorbed phase of protein residue pool	-
QROM4	Adsorbed phase of chitin residue pool	-
QROM5	Adsorbed phase of nucleic acids residue pool	-
QROM6	Adsorbed phase of phospholipid residue pool	-
QROM7	Adsorbed phase of inositol phosphorus residue pool	-
QLOM1	Adsorbed phase of large carbohydrate polymer pool	-
QLOM2	Adsorbed phase of polypeptide pool	-
QOOM1	Adsorbed phase of carbohydrate oligopolymer pool	-
QOOM2	Adsorbed phase of oligopeptide pool	-
QOOM3	Adsorbed phase of chitin oligopolymer pool	-
QOOM4	Adsorbed phase of oligonucleotide pool	-
QOOM5	Adsorbed phase of lyso-phosphatidylcholine polymer pool	-
QMOM	Adsorbed phase of monomer pool	-
MROM1	Mineral-protected carbohydrate residue pool	-
MROM2	Mineral-protected lignin residue pool	-
MROM3	Mineral-protected protein residue pool	-
MROM4	Mineral-protected chitin residue pool	-
MROM5	Mineral-protected nucleic acids residue pool	-
MROM6	Mineral-protected phospholipid residue pool	-
MROM7	Mineral-protected inositol phosphorus residue pool	-
MLOM1	Mineral-protected large carbohydrate polyme pool	-
MLOM2	Mineral-protected polypeptide pool	-
MOOM1	Mineral-protected carbohydrate oligopolymer pool	-
MOOM2	Mineral-protected oligopeptide pool	-
MOOM3	Mineral-protected chitin oligopolymer pool	-
MOOM4	Mineral-protected oligonucleotide pool	-
MOOM5	Mineral-protected lyso-phosphatidylcholine polymer pool	-
MMOM	Mineral-protected monomer pool	-
MBA	Active microbial biomass pool	Nmono,
		Pmono3
MBD	Dormant microbial biomass pool	-
IN1	Ammonium (NH4-) pool	NinN1,
		NinN3
IN2	Nitrate (NO3-) pool	NinN2,
		NinN4
Dissolved IP (DIP)	Dissolved inorganic P	PinP
Labile IP (LIP)	Labile inorganic P	-
Secondary IP (SIP)	Secondary mineral P	-
Occluded IP (OIP)	Occluded inorganic P	-
Primary IP (PIP)	Primary mineral P	-
